# Supplementary material for: Targeting age‐specific changes in CD4+ T cell metabolism ameliorates alloimmune responses and prolongs graft survival
Source: PubMed Central journal article supplement (PMC7884034; doi:10.1111/acel.13299), 2021-01-26

A.

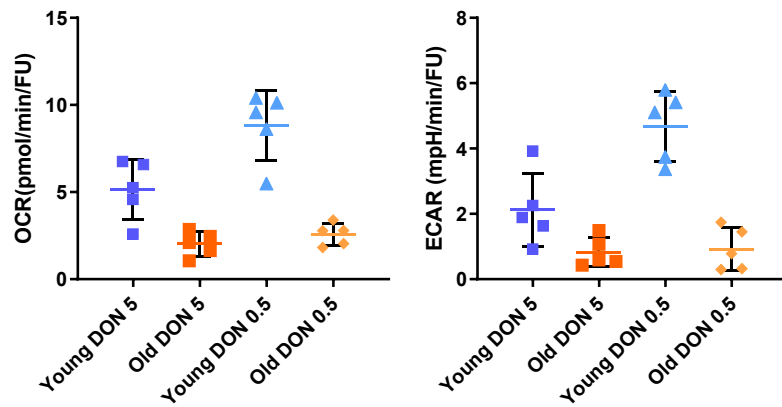

B.

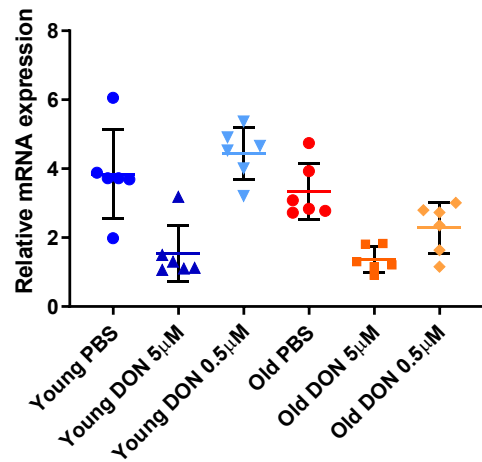

Supplement: ACEL-20-e13299-s001.pdf [file ACEL-20-e13299-s001.pdf]
