# Supplementary material for: Targeting age‐specific changes in CD4+ T cell metabolism ameliorates alloimmune responses and prolongs graft survival
Source: PubMed Central journal article supplement (PMC7884034; doi:10.1111/acel.13299), 2021-01-26

**A.**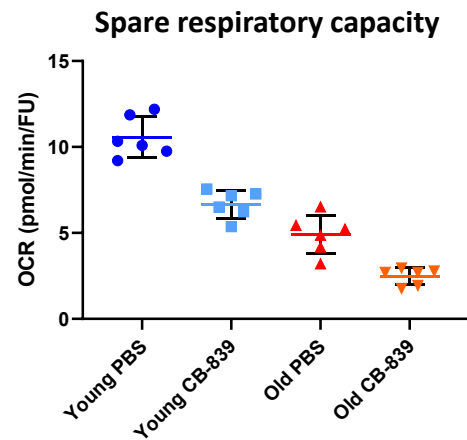**B.**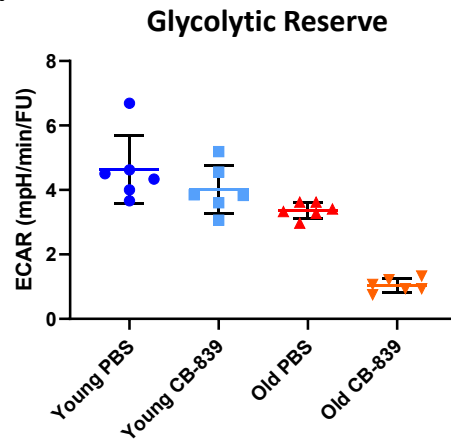**C.**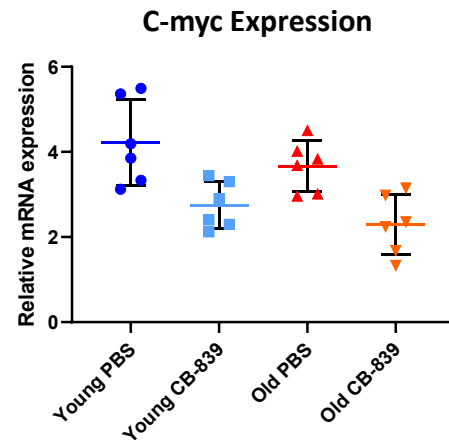**D.**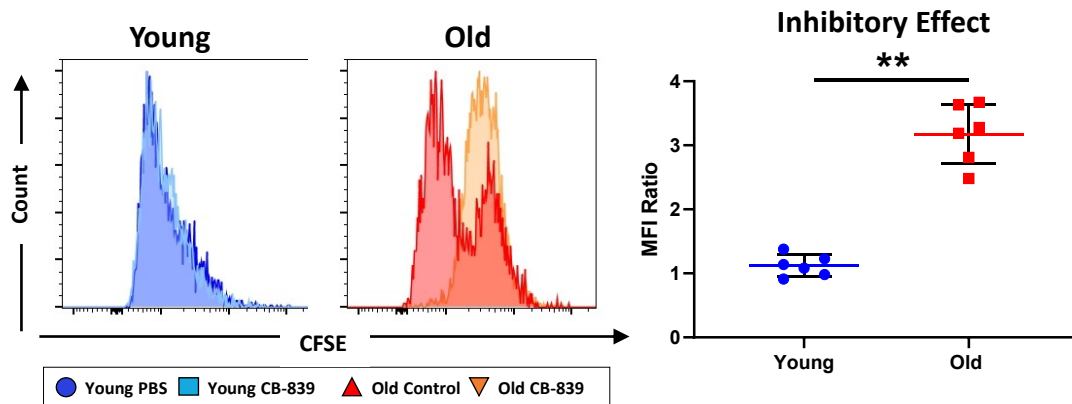**E.**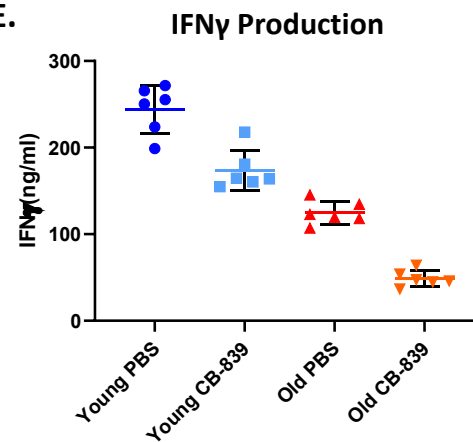

Supplement: ACEL-20-e13299-s002.pdf [file ACEL-20-e13299-s002.pdf]
